# Supplementary material for: Covid-19 Symptomatic Patients with Oral Lesions: Clinical and Histopathological Study on 123 Cases of the University Hospital Policlinic of Bari with a Purpose of a New Classification
Source: PubMed Central journal article supplement (PMC7918830; doi:10.3390/jcm10040757), 2021-02-13
Supplement: jcm-10-00757-s001.pdf [file jcm-10-00757-s001.pdf]

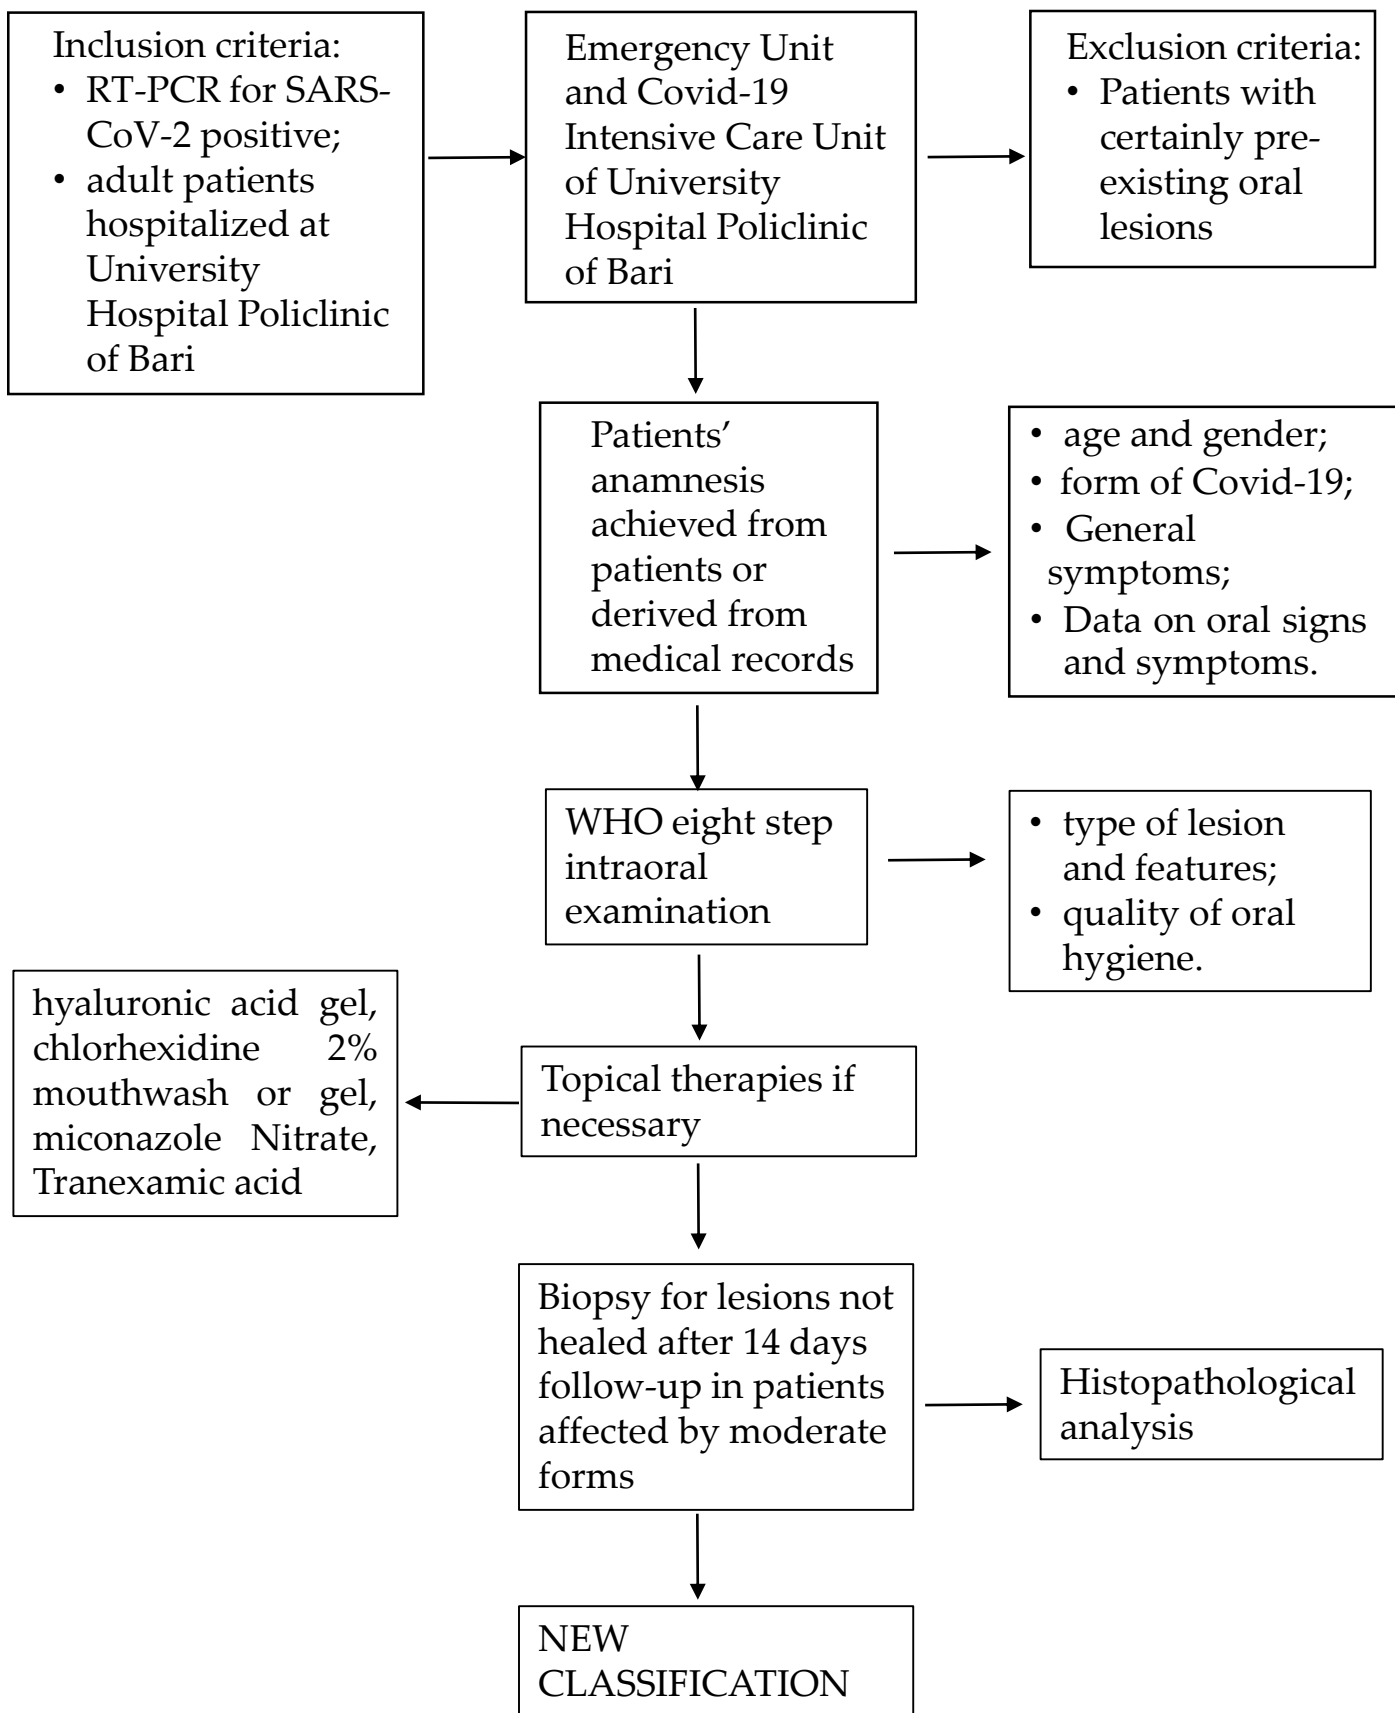

FC1. Diagnostic-therapeutic protocol of oral lesions in Covid-19 patients.
